# Supplementary material for: Remote Sensing-Based Prediction of Temporal Changes in Land Surface Temperature and Land Use-Land Cover (LULC) in Urban Environments
Source: MDPI journal article supplement (doi:10.3390/land11091610), 2022-09-19
Supplement: s1 [file s1]

# Supplementary Material

## Remote sensing-based prediction of temporal changes in land surface temperature and land use-land cover (LULC) in urban environments

Mohsin Ramzan<sup>1,2</sup>, Zulfiqar Ahmad Saqib<sup>3,7,\*</sup>, Ejaz Hussain<sup>1</sup>, Junaid Aziz Khan<sup>1</sup>, Abid Nazir<sup>4</sup>, Muhammad Yousif Sardar Dasti<sup>5</sup>, Saqib Ali<sup>6</sup> and Nabeel Khan Niazi<sup>3,8,\*</sup>

- <sup>1</sup> Institute of Geographical Information Systems, National University of Science & Technology (NUST), Islamabad 44000, Pakistan
- <sup>2</sup> Department of Urban & Regional Planning, University of Buffalo, Buffalo, New York 14260-1660, USA
- <sup>3</sup> Institute of Soil and Environmental Sciences, University of Agriculture Faisalabad, Faisalabad 38040, Pakistan
- <sup>4</sup> Plant and Environmental Sciences, New Mexico State University, Las Cruces, NM 88003, the United States of America
- <sup>5</sup> School of Geoscience and info-physics, Central South University, Changsha, Hunan, , 410083, PR. China
- <sup>6</sup> Department of Computer Science, University of Agriculture Faisalabad, Faisalabad 38040, Pakistan
- <sup>7</sup> Agricultural Remote Sensing Laboratory (ARSL), National Centre of GIS and Space Application (NCGSA), Islamabad, Pakistan
- <sup>8</sup> Faculty of Engineering and Science, Southern Cross University, Lismore 2480, NSW, Australia

Corresponding authors emails: Z.A. Saqib ([zulfiqar.dasti@uaf.edu.pk](mailto:zulfiqar.dasti@uaf.edu.pk)); N.K. Niazi ([nabeelkniazi@gmail.com](mailto:nabeelkniazi@gmail.com); [nabeel.niazi@uaf.edu.pk](mailto:nabeel.niazi@uaf.edu.pk))

Corresponding authors emails: Z.A. Saqib ([zulfiqar.dasti@uaf.edu.pk](mailto:zulfiqar.dasti@uaf.edu.pk)); N.K. Niazi ([nabeelkniazi@gmail.com](mailto:nabeelkniazi@gmail.com); [nabeel.niazi@uaf.edu.pk](mailto:nabeel.niazi@uaf.edu.pk))

**Table S1:** Accuracy Assessment of LULC Classification for 1992

| Landsat LULC Classes     |            |            |          |           |       |             |               |
|--------------------------|------------|------------|----------|-----------|-------|-------------|---------------|
| 09/06/1992               |            | Vegetation | Built Up | Bare Land | Water | Total Count | User Accuracy |
| Classified               | Vegetation | 267        | 0        | 4         | 15    | 286         | 93.3          |
| LULC                     | Built Up   | 0          | 275      | 34        | 0     | 309         | 88.9          |
| Classes                  | Bare Land  | 0          | 19       | 262       | 0     | 281         | 93.2          |
|                          | Water      | 33         | 6        | 0         | 285   | 324         | 87.9          |
| Total Count              |            | 300        | 300      | 300       | 300   | 1200        |               |
| Producer Accuracy        |            | 89         | 91.6     | 87.3      | 95    |             |               |
| Overall Kappa Statistics |            |            |          |           |       | 0.87        |               |

**Table S2:** Accuracy Assessment of LULC Classification for 1996

| Landsat LULC Classes     |            |      |          |           |       |             |               |                  |
|--------------------------|------------|------|----------|-----------|-------|-------------|---------------|------------------|
| 04/06/1996               | Vegetation |      | Built Up | Bare Land | Water | Total Count | User Accuracy | Overall Accuracy |
| Classified               | Vegetation | 269  | 3        | 0         | 14    | 286         | 94.05         |                  |
| LULC                     | Built Up   | 1    | 277      | 35        | 1     | 314         | 88.21         | 91.2             |
| Classes                  | Bare Land  | 1    | 19       | 265       | 1     | 286         | 92.65         |                  |
|                          | Water      | 29   | 1        | 0         | 284   | 314         | 90.4          |                  |
| Total Count              |            | 300  | 300      | 300       | 300   | 1200        |               |                  |
| Producer Accuracy        |            | 89.6 | 92.33    | 88.33     | 94.66 |             |               |                  |
| Overall Kappa Statistics |            |      |          |           |       | 0.89        |               |                  |

**Table S3:** Accuracy Assessment of LULC Classification for 2000

|                          |            | Landsat LULC Classes |          |           |       |             |               |                  |
|--------------------------|------------|----------------------|----------|-----------|-------|-------------|---------------|------------------|
| 30/05/2000               |            | Vegetation           | Built Up | Bare Land | Water | Total Count | User Accuracy | Overall Accuracy |
| Classified               | Vegetation | 268                  | 0        | 2         | 19    | 289         | 92.73         | 90.7             |
| LULC                     | Built Up   | 4                    | 273      | 31        | 0     | 308         | 88.63         |                  |
| Classes                  | Bare Land  | 0                    | 27       | 267       | 0     | 294         | 90.81         |                  |
|                          | Water      | 28                   | 0        | 0         | 281   | 309         | 90.93         |                  |
| Total Count              |            | 300                  | 300      | 300       | 300   |             | 1200          |                  |
| Producer Accuracy        |            | 89.33                | 91       | 89        | 93.6  |             |               |                  |
| Overall Kappa Statistics |            |                      |          |           |       | 0.83        |               |                  |

**Table S4:** Accuracy Assessment of LULC Classification for 2008

|                          |            | Landsat LULC Classes |          |           |       |             |               |                  |
|--------------------------|------------|----------------------|----------|-----------|-------|-------------|---------------|------------------|
| 05/06/2008               |            | Vegetation           | Built Up | Bare Land | Water | Total Count | User Accuracy | Overall Accuracy |
|                          | Classified | Vegetation           | 278      | 0         | 3     | 16          | 297           | 93.6             |
|                          | LULC       | Built Up             | 1        | 277       | 24    | 0           | 302           | 91.72            |
|                          | Classes    | Bare Land            | 1        | 23        | 271   | 5           | 300           | 90.33            |
|                          |            | Water                | 20       | 0         | 2     | 279         | 301           | 92.69            |
| Total Count              |            | 300                  | 300      | 300       | 300   | 1200        |               |                  |
| Producer Accuracy        |            | 92.66                | 92.33    | 90.66     | 92.69 |             |               |                  |
| Overall Kappa Statistics |            |                      |          |           |       | 0.89        |               |                  |

**Table S5:** Accuracy Assessment of LULC Classification for 2014

| Landsat LULC Classes     |            |       |          |           |       |             |               |                  |
|--------------------------|------------|-------|----------|-----------|-------|-------------|---------------|------------------|
| 6/6/2014                 | Vegetation |       | Built Up | Bare Land | Water | Total Count | User Accuracy | Overall Accuracy |
| Classified               | Vegetation | 278   | 0        | 3         | 16    | 297         | 93.6          |                  |
| LULC                     | Built Up   | 1     | 277      | 24        | 0     | 302         | 91.72         | 92.58            |
| Classes                  | Bare Land  | 1     | 23       | 272       | 0     | 296         | 91.89         |                  |
|                          | Water      | 20    | 0        | 1         | 284   | 305         | 93.11         |                  |
| Total Count              |            | 300   | 300      | 300       | 300   | 1200        |               |                  |
| Producer Accuracy        |            | 92.66 | 92.33    | 90.66     | 94.66 |             |               |                  |
| Overall Kappa Statistics |            |       |          |           |       | 0.9         |               |                  |

**Table S6:** Accuracy Assessment of LULC Classification for 2017

| Landsat LULC Classes     |            |       |          |           |       |             |               |                  |
|--------------------------|------------|-------|----------|-----------|-------|-------------|---------------|------------------|
| 14/06/2017               | Vegetation |       | Built Up | Bare Land | Water | Total Count | User Accuracy | Overall Accuracy |
| Classified               | Vegetation | 269   | 0        | 5         | 16    | 290         | 92.75         |                  |
| LULC                     | Built Up   | 12    | 271      | 30        | 4     | 317         | 85.48         | 90.25            |
| Classes                  | Bare Land  | 4     | 28       | 264       | 1     | 297         | 88.88         |                  |
|                          | Water      | 15    | 1        | 1         | 279   | 296         | 94.2          |                  |
| Total Count              |            | 300   | 300      | 300       | 300   | 1200        |               |                  |
| Producer Accuracy        |            | 89.66 | 90.3     | 88        | 93    |             |               |                  |
| Overall Kappa Statistics |            |       |          |           |       | 0.88        |               |                  |

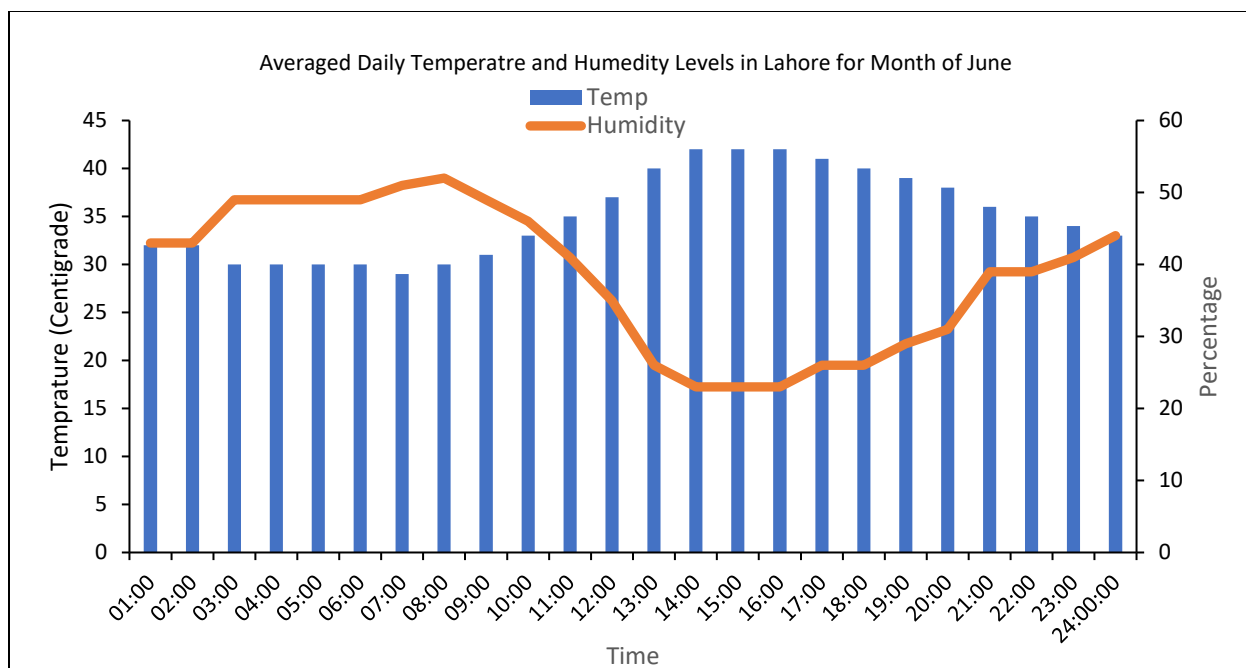

Figure S1: Averaged Daily Temperature and Humidity Levels in Lahore for Month of June

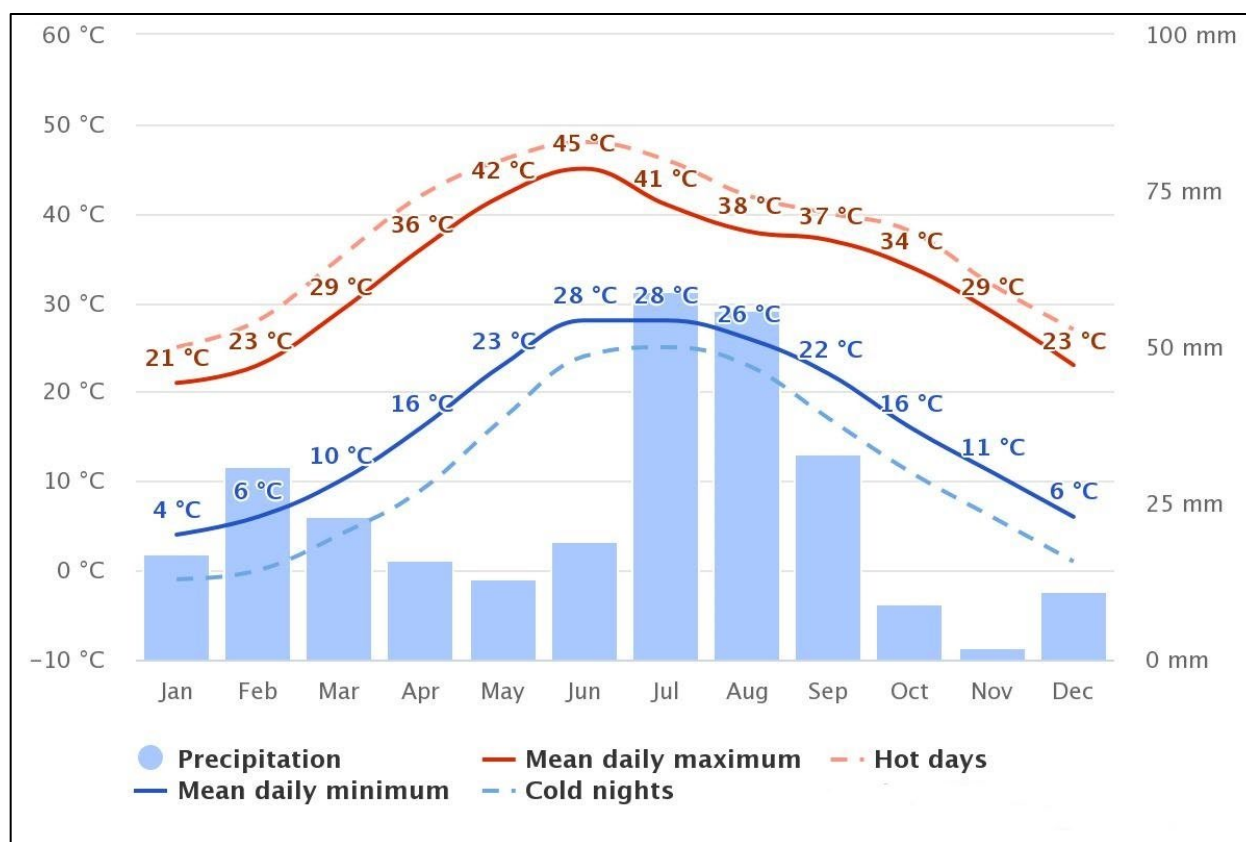

Figure S2: Monthly Climatic Conditions (Precipitation, Mean daily Temp (max and min) and day and night Temp fluctuations in Lahore
